# Supplementary figures and images for: Collision-induced state-changing rate coefficients for cyanogen backbones NCN 3Σ− and CNN 3Σ− in astrophysical environments
Source: Royal Society of Chemistry journal article supplement (doi:10.1039/d3cp03316c), 2023-01-01

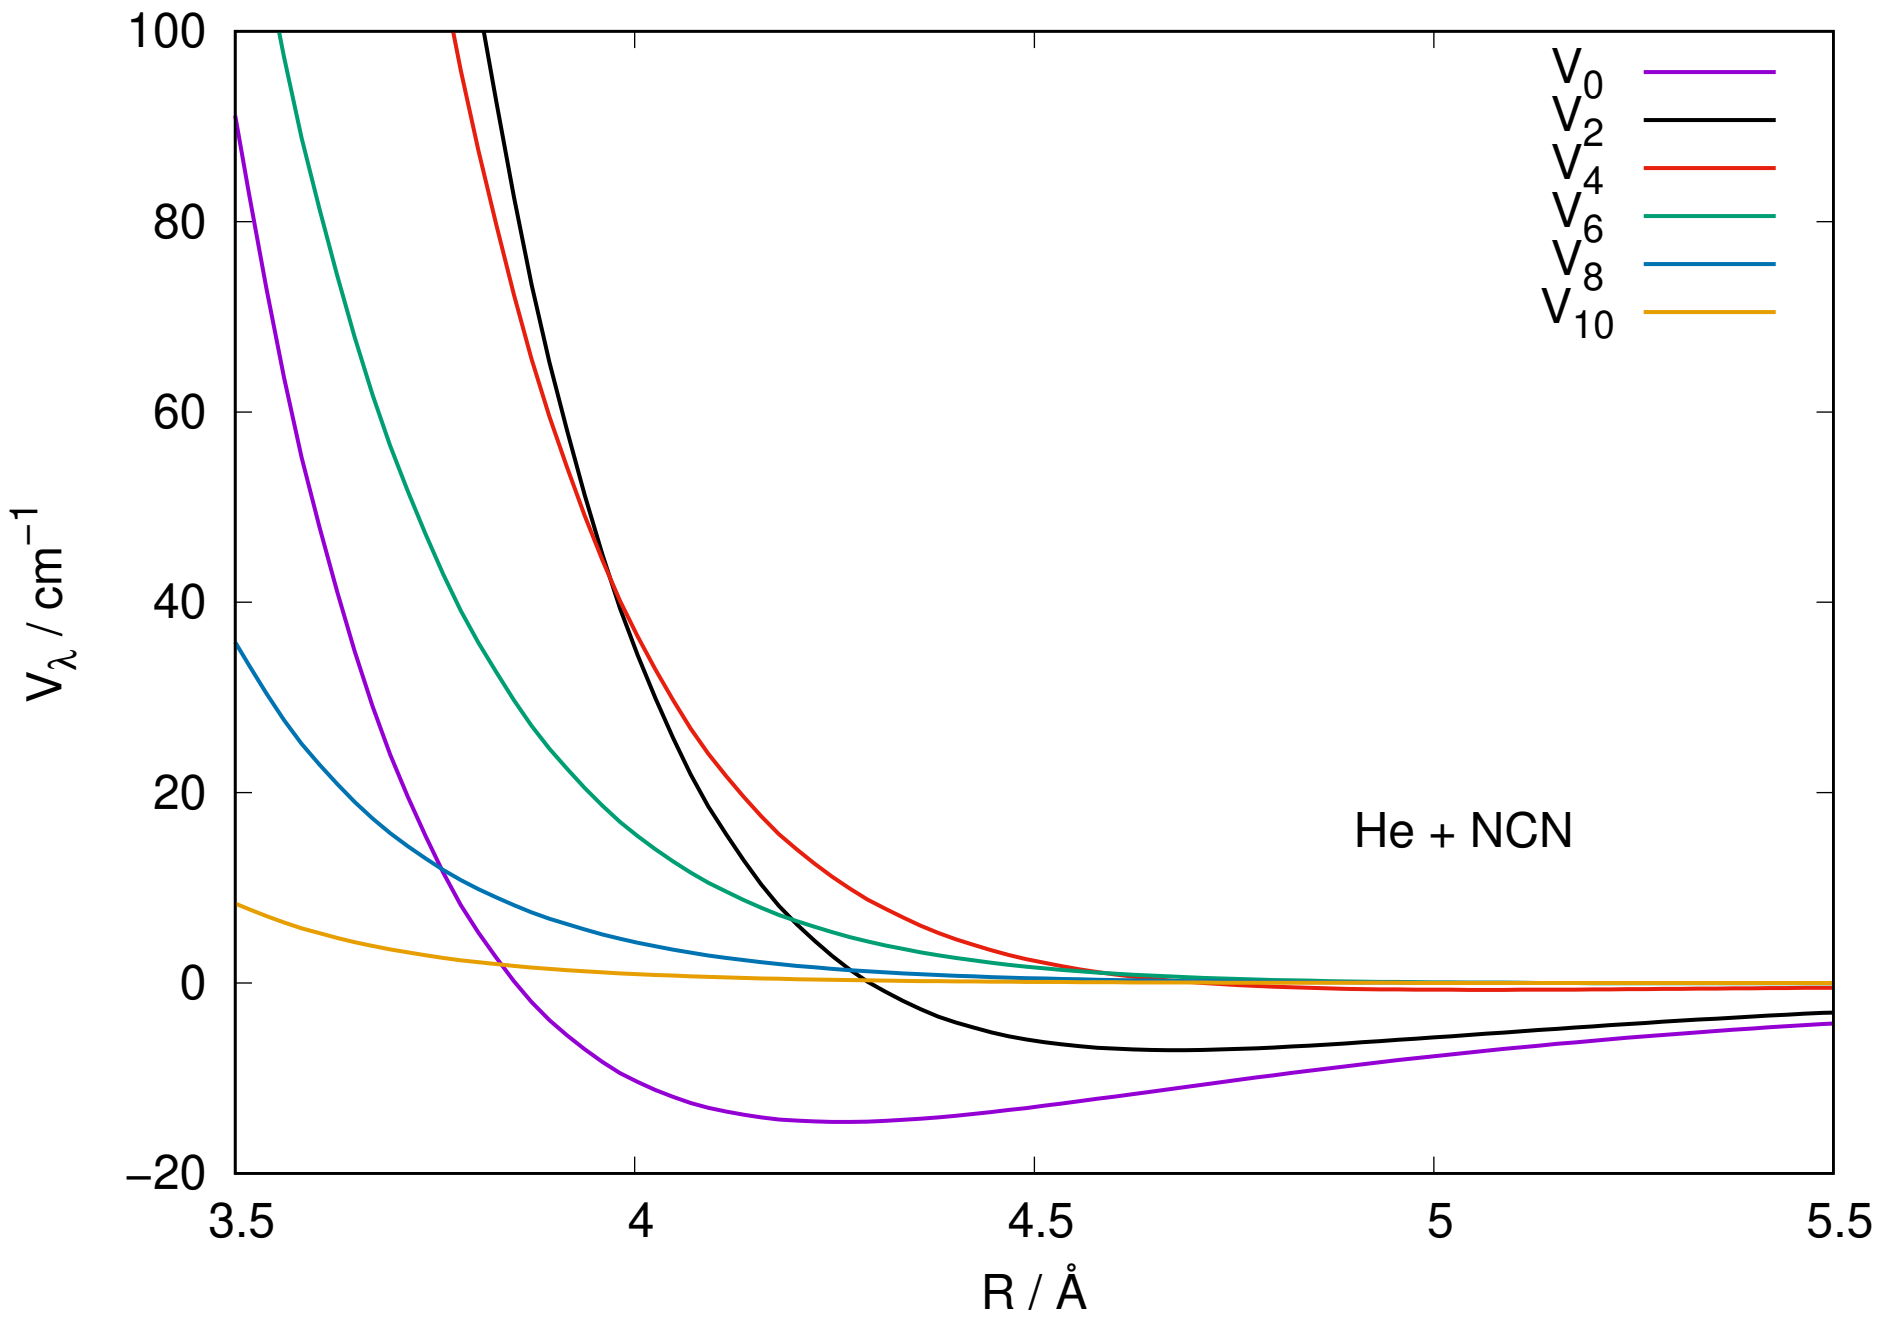

Supplement: d3cp03316c1.zip [file d3cp03316c1.zip]

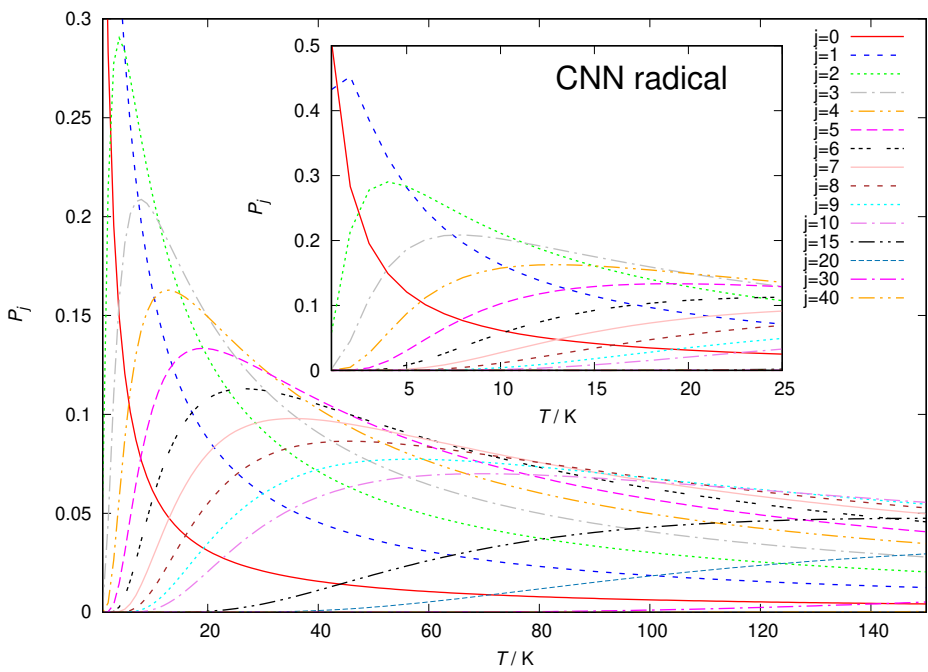

Supplement: d3cp03316c1.zip [file d3cp03316c1.zip]

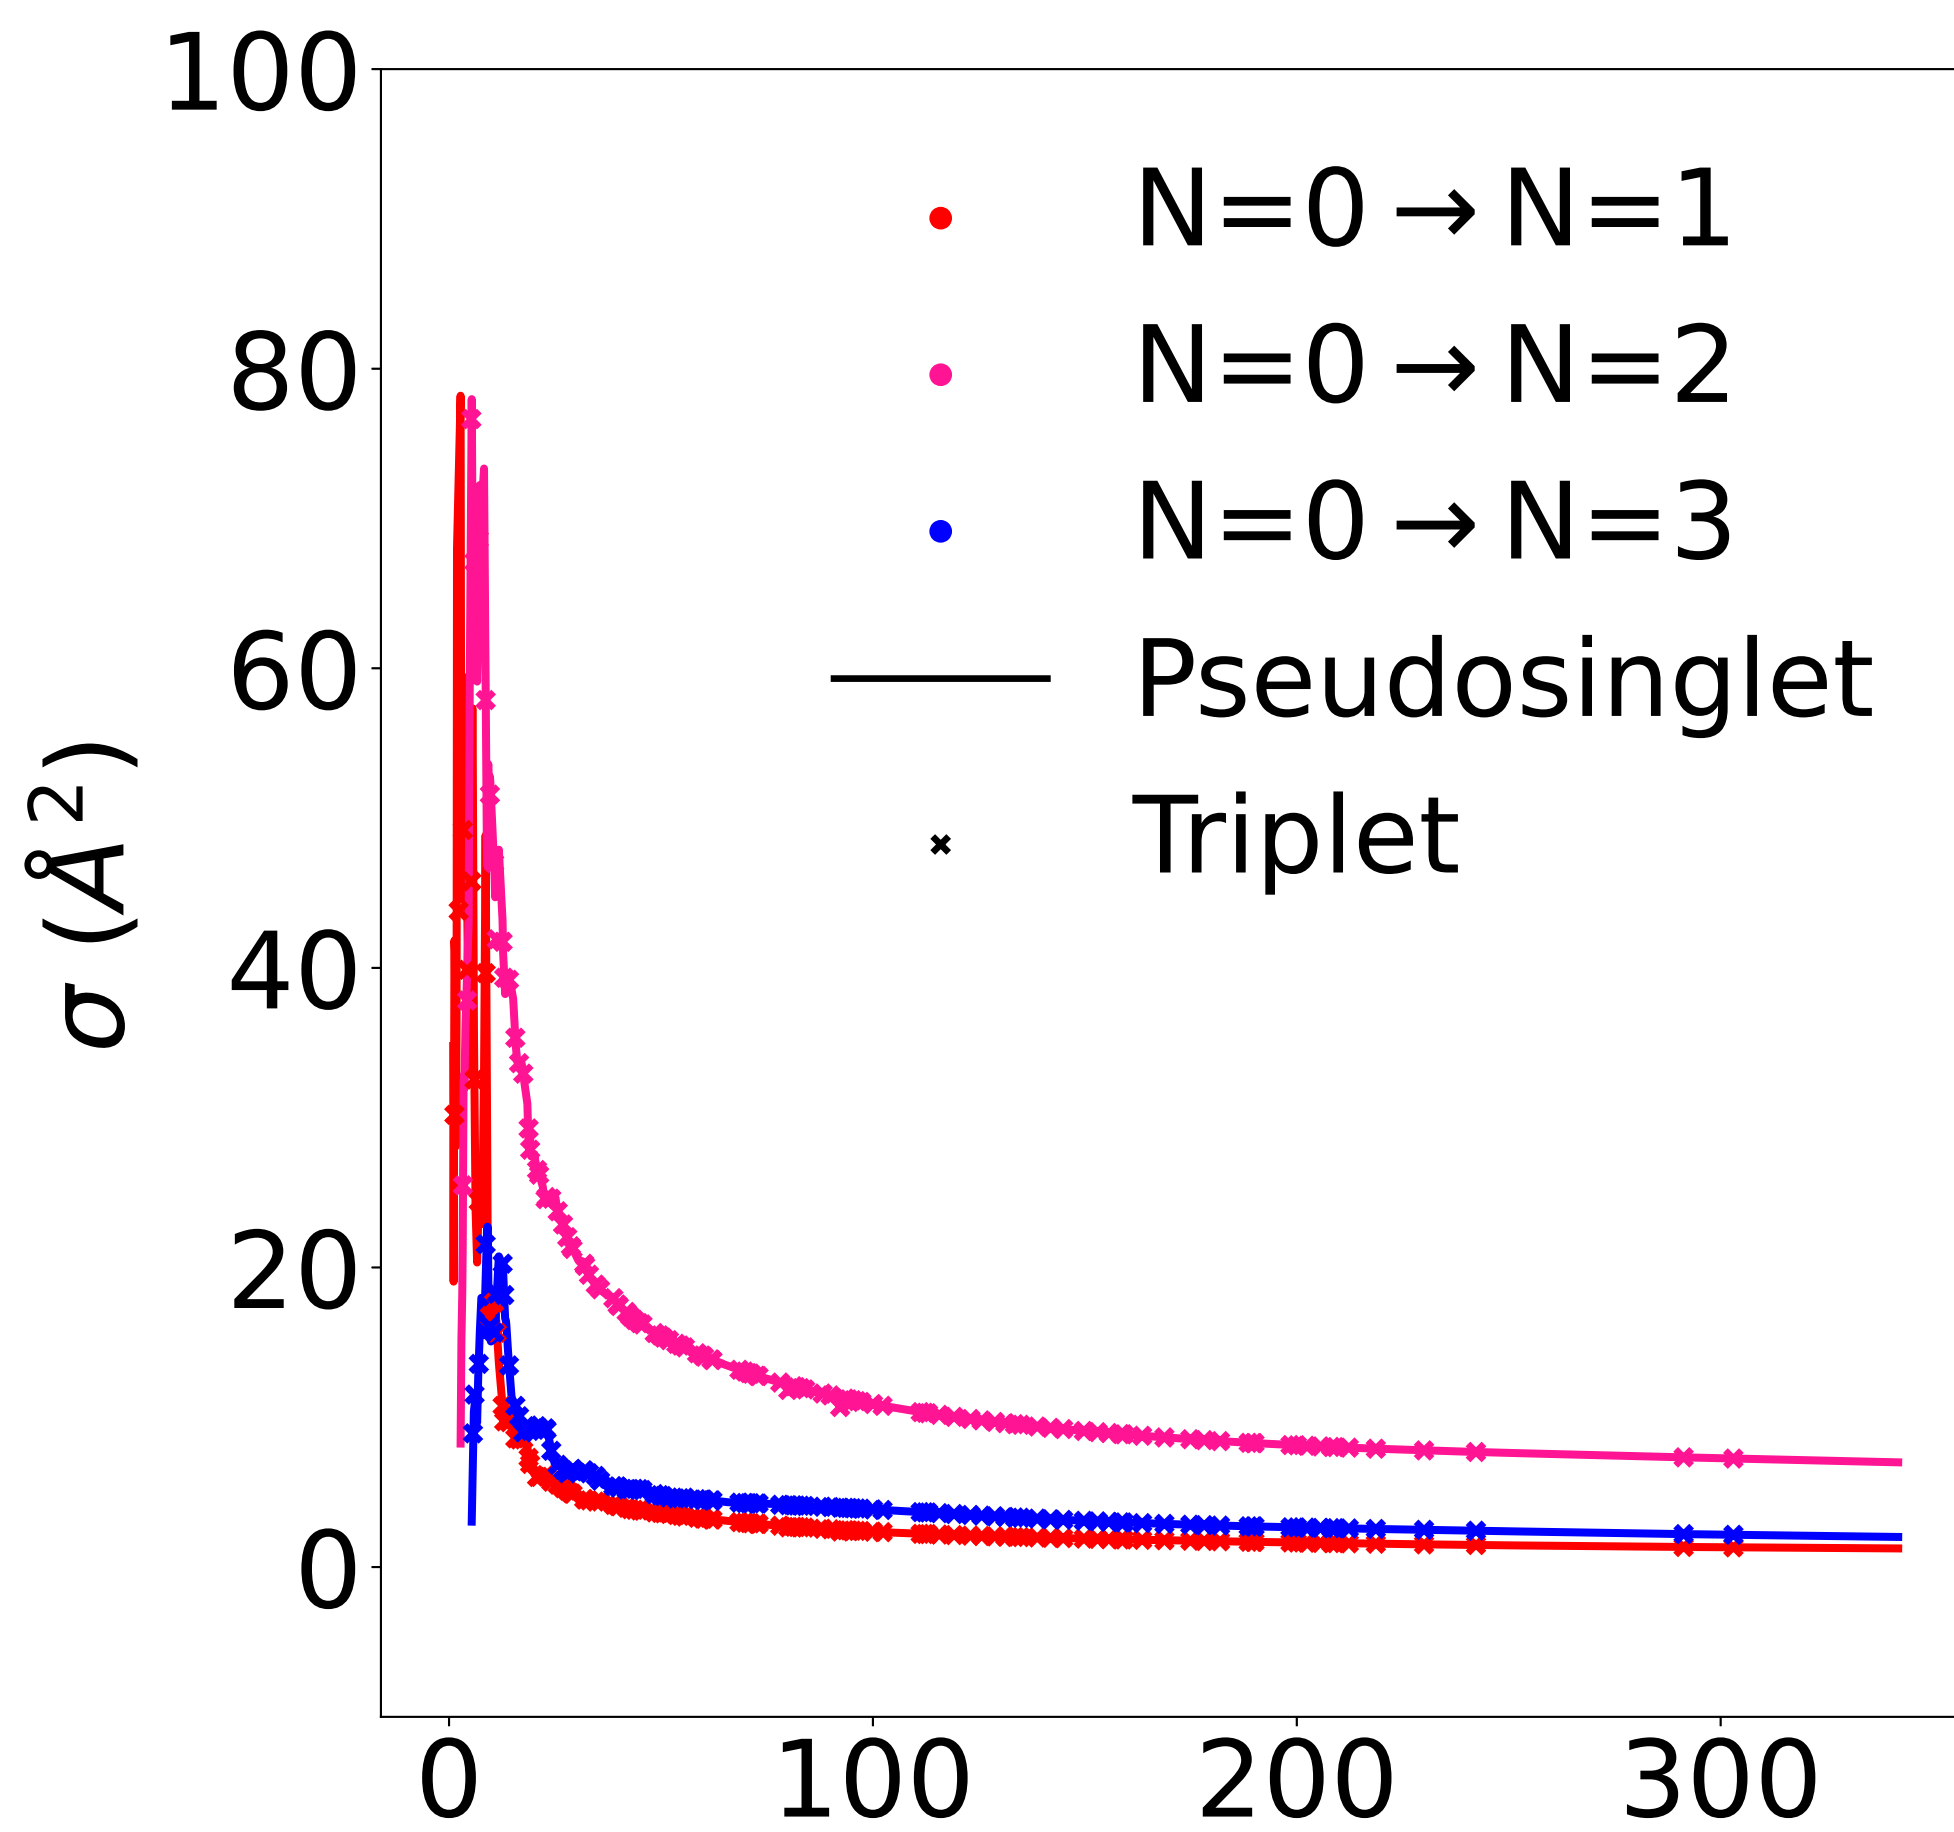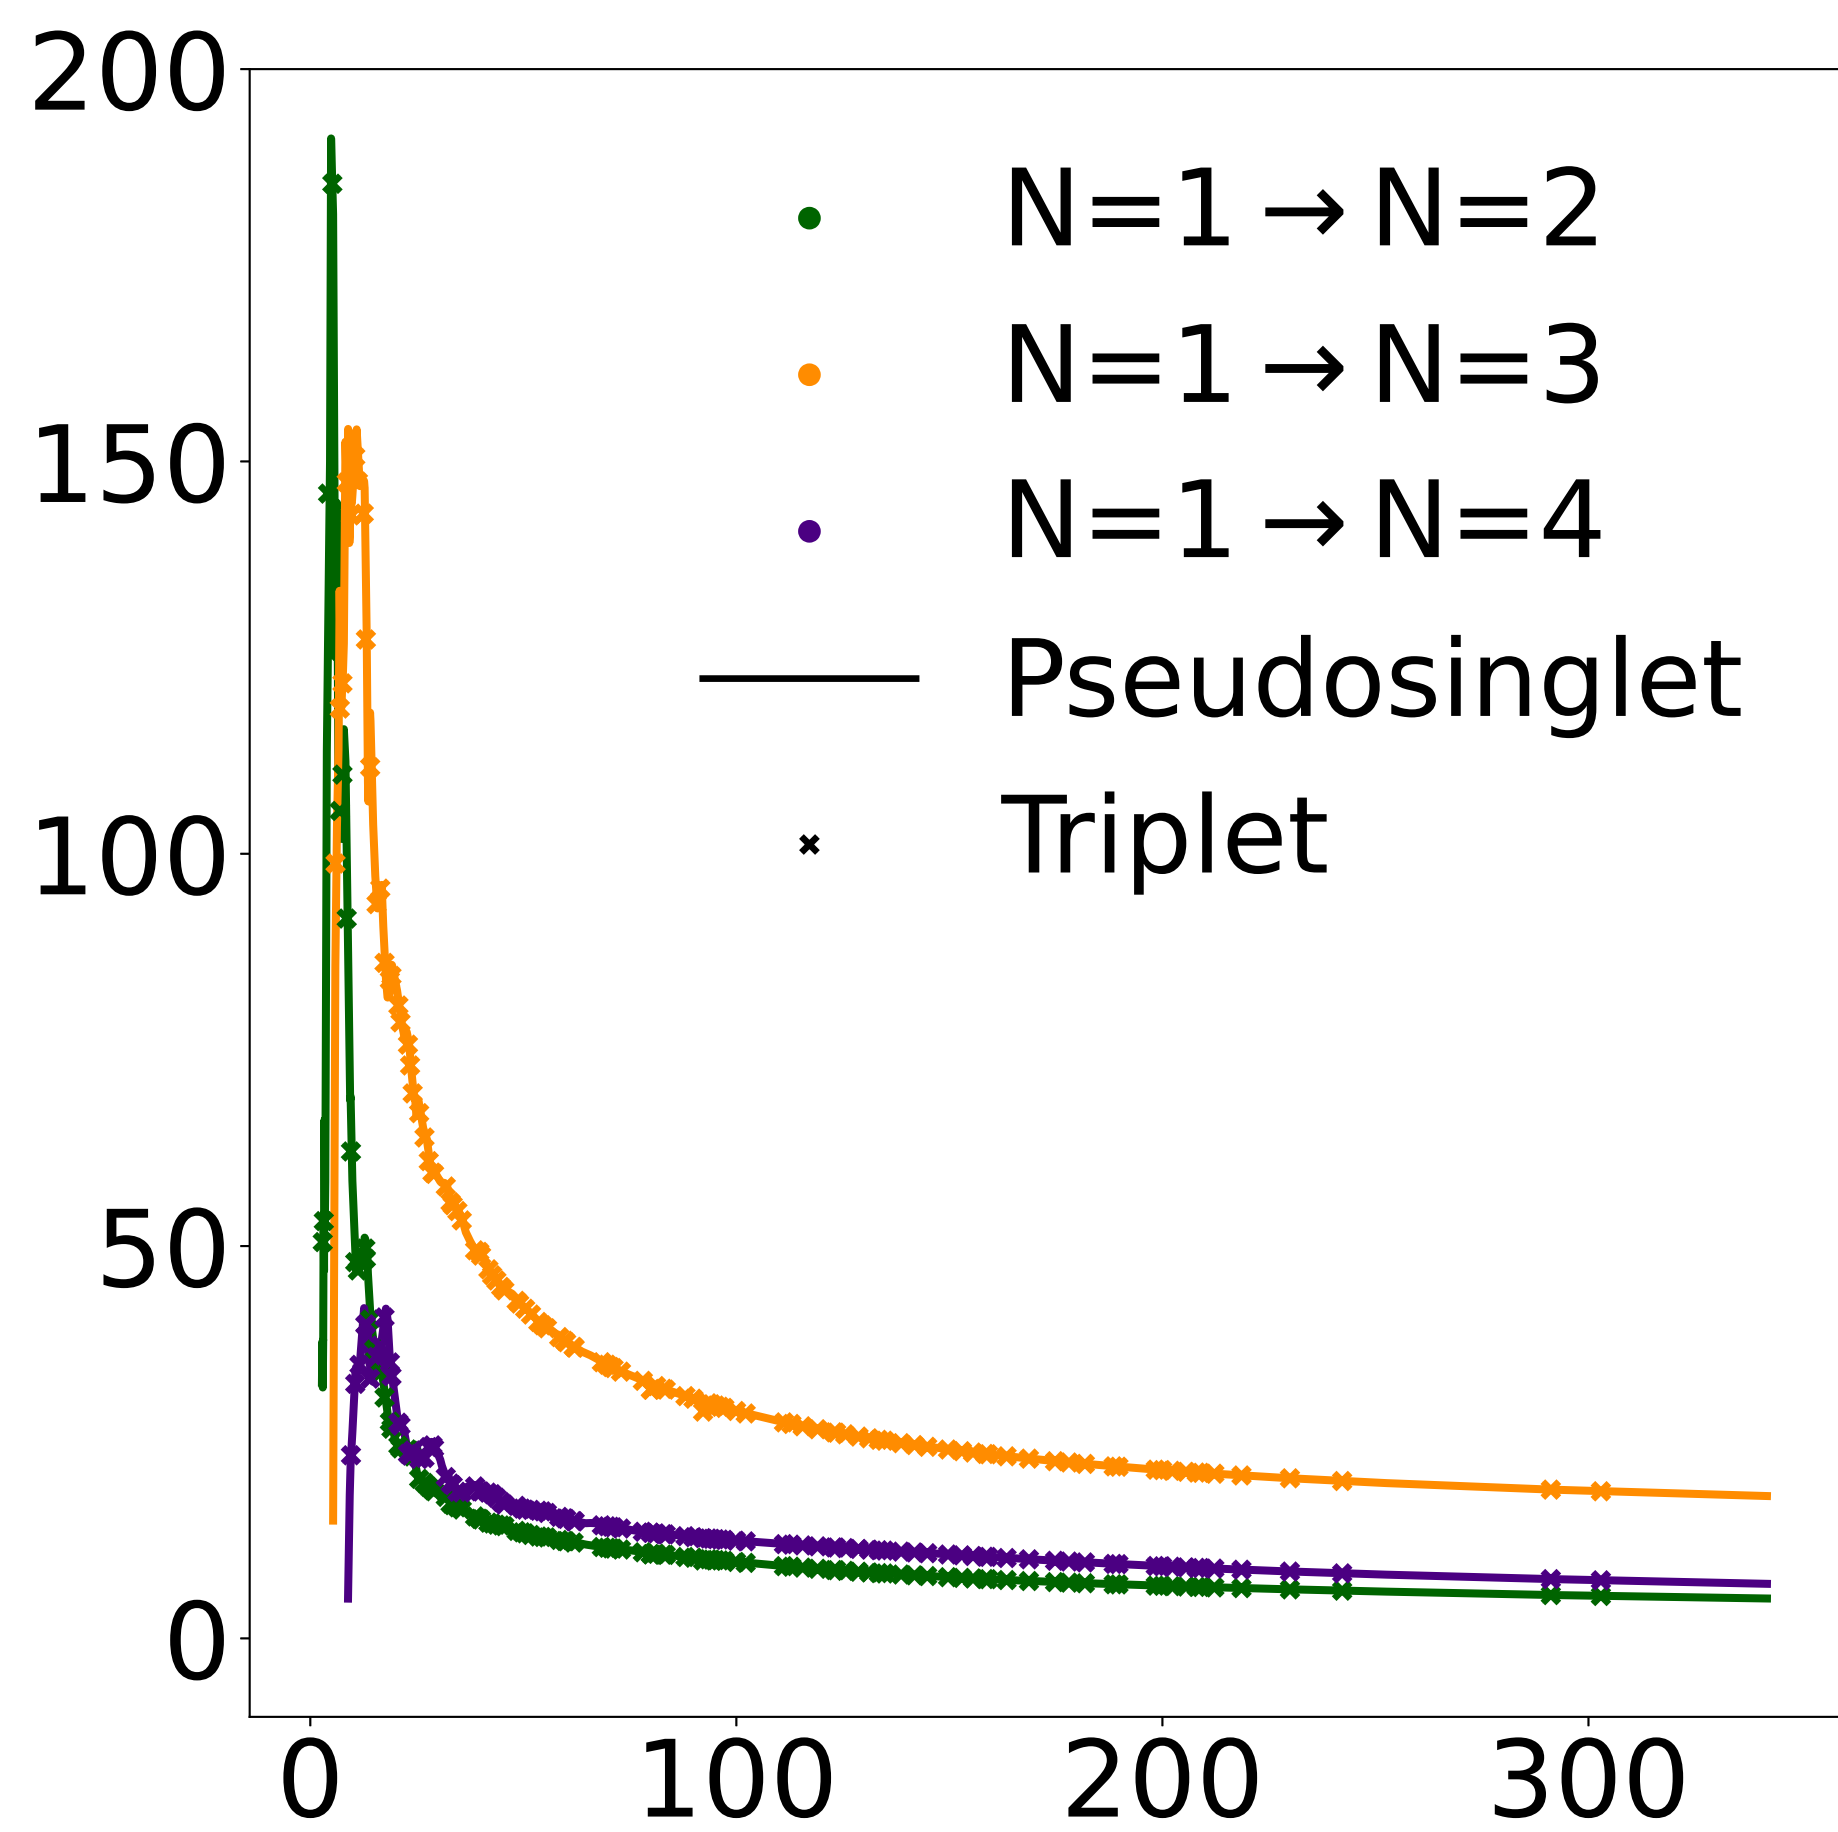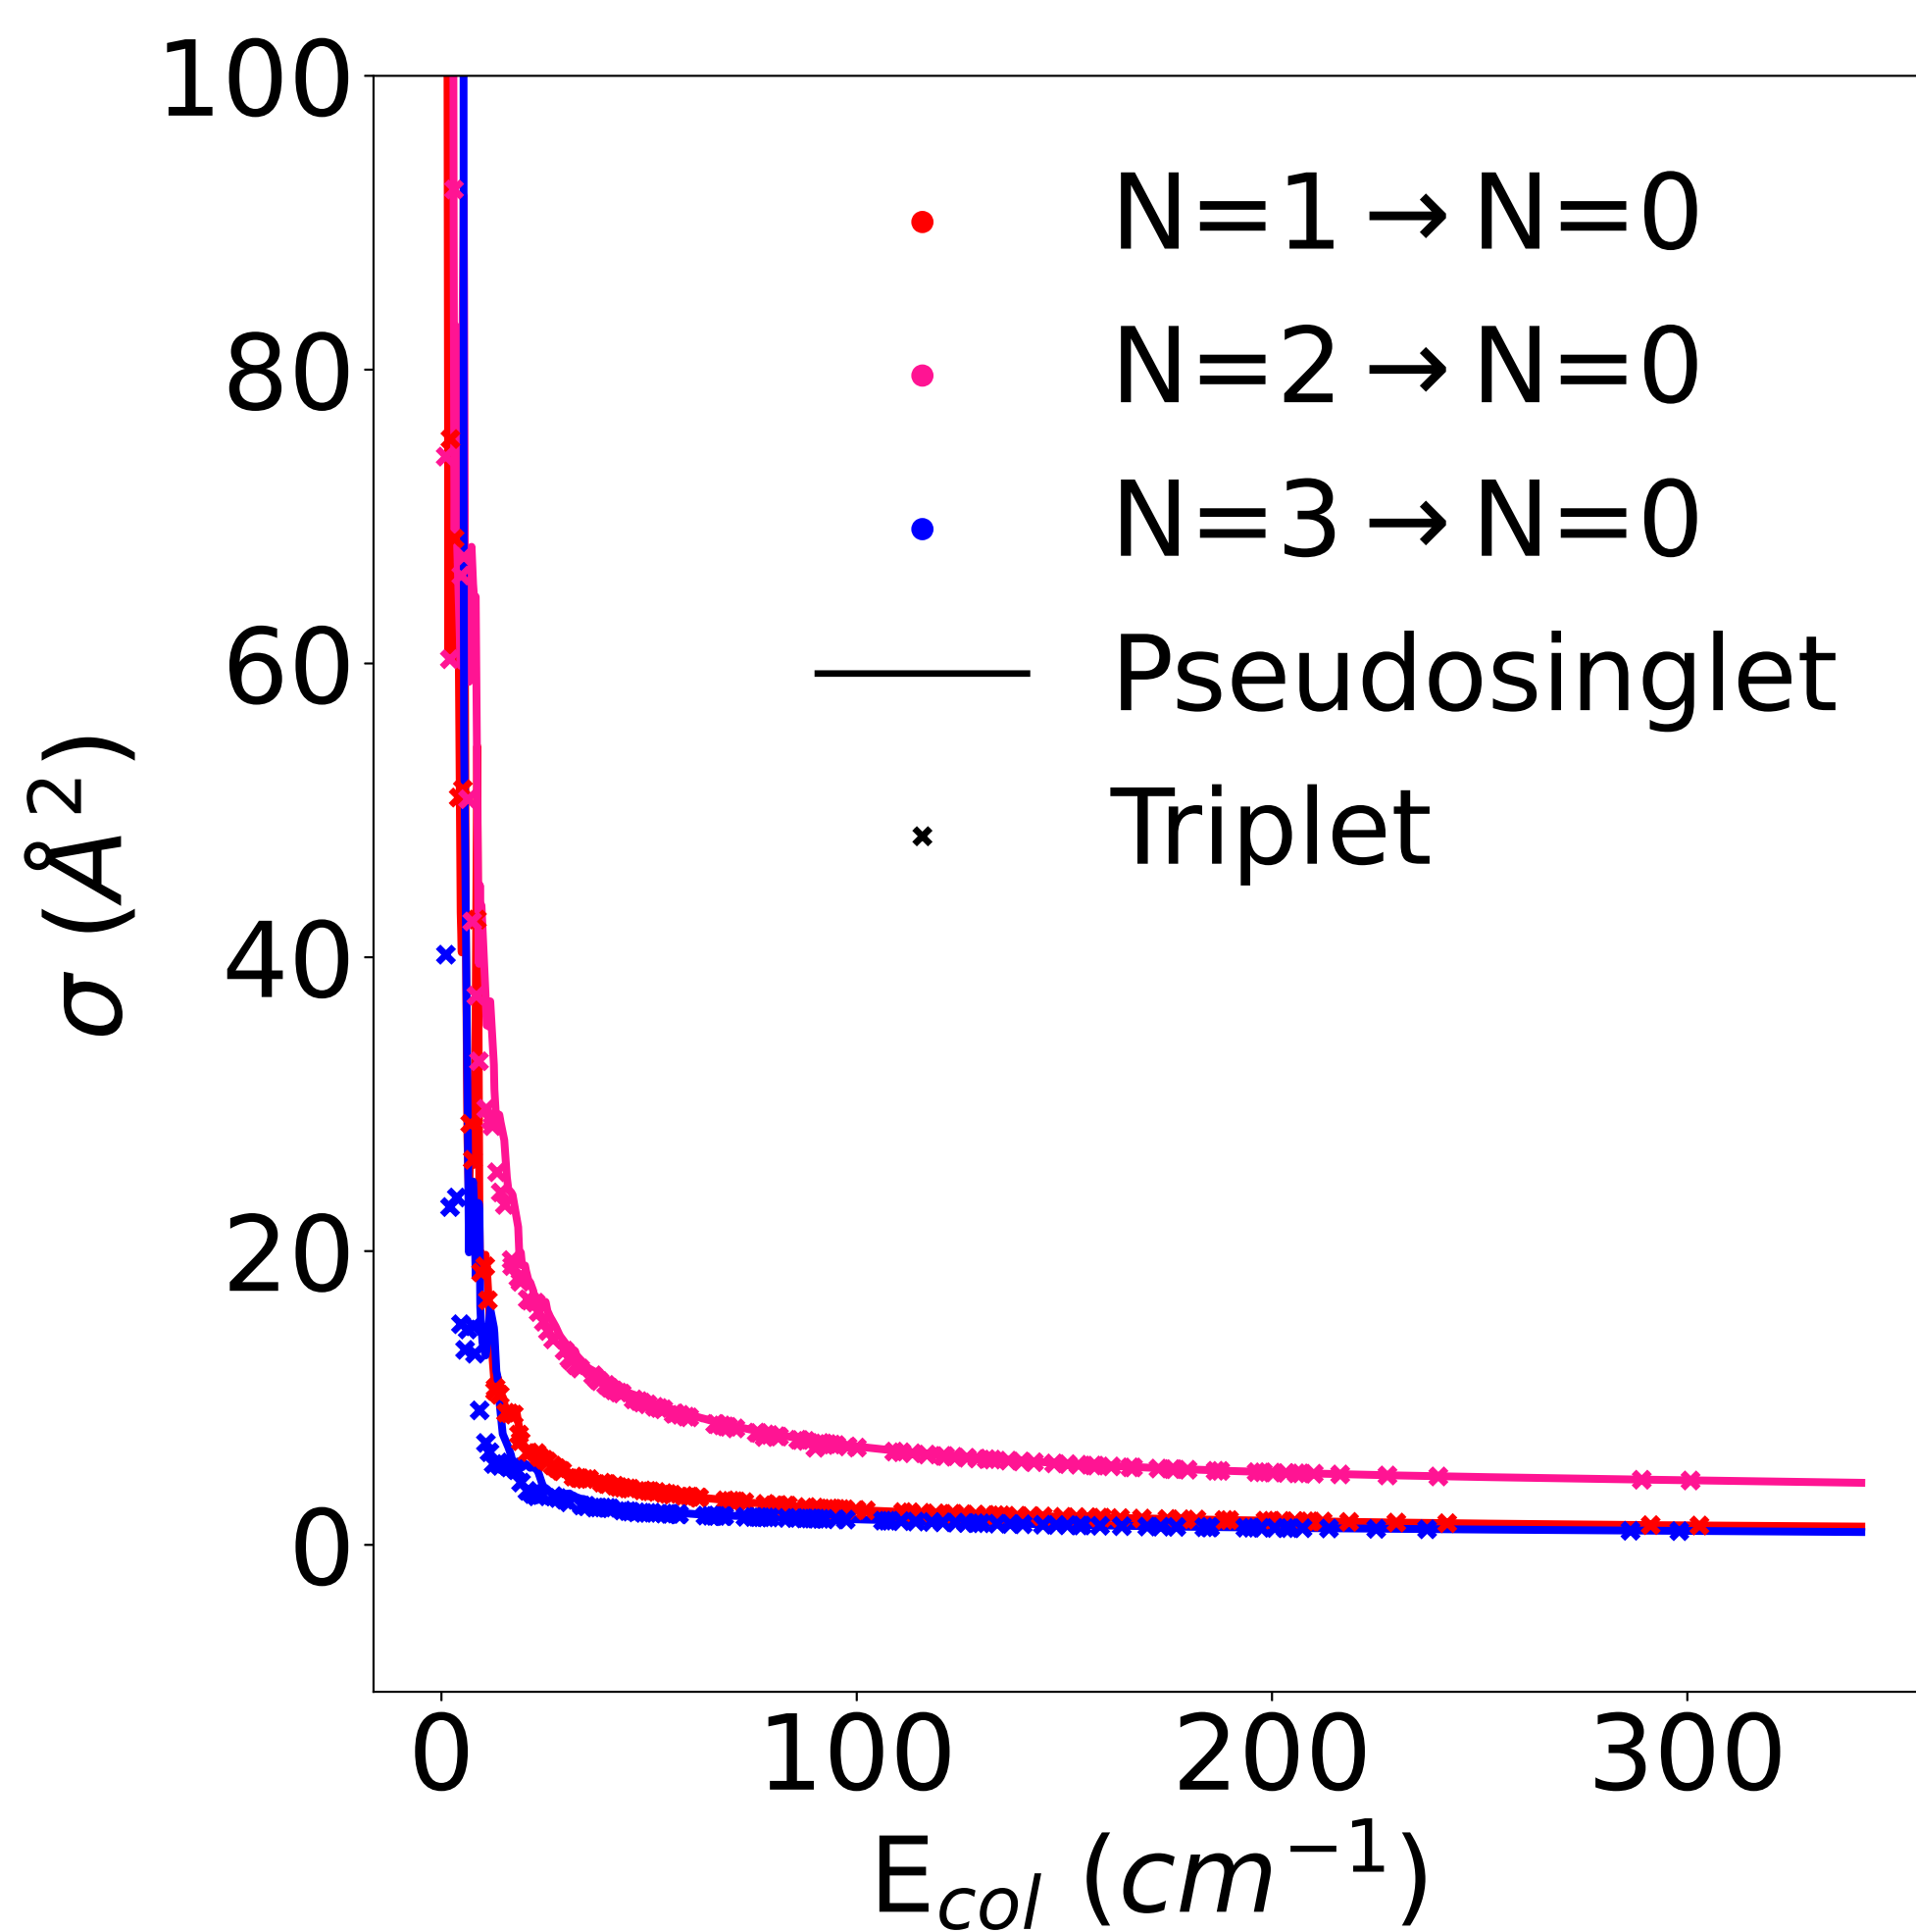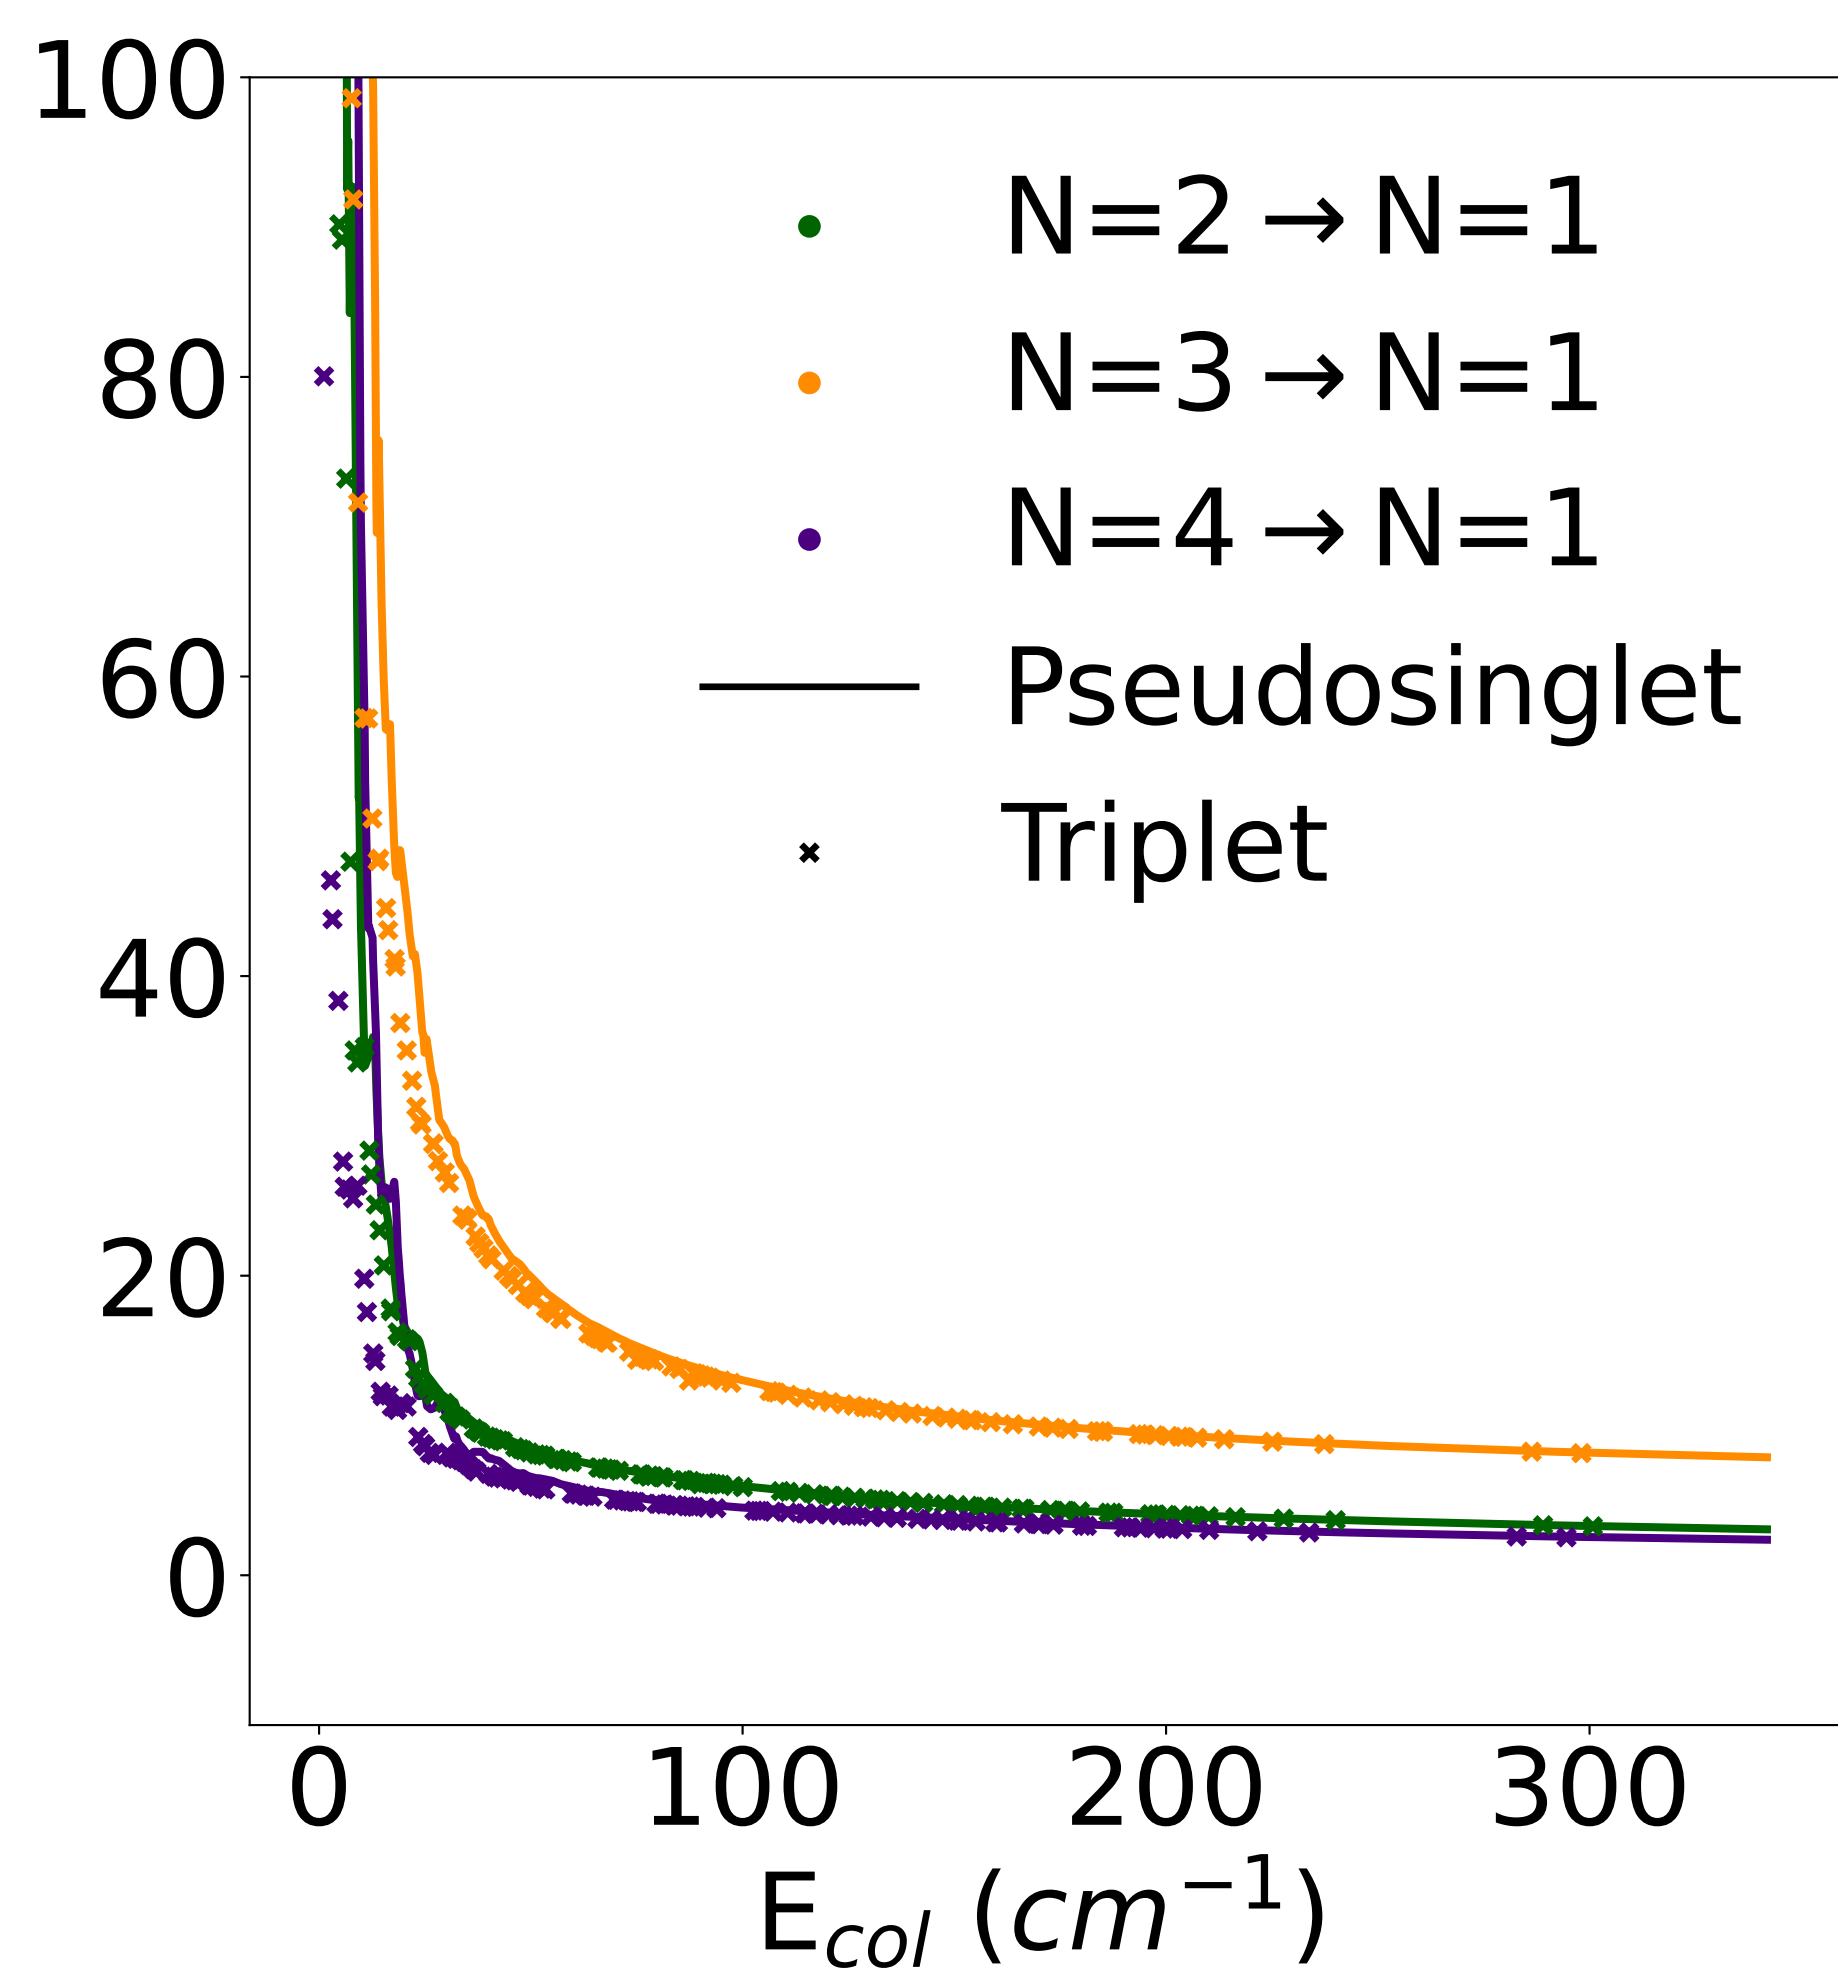

Supplement: d3cp03316c1.zip [file d3cp03316c1.zip]

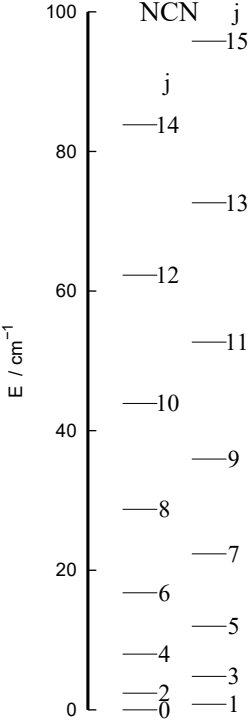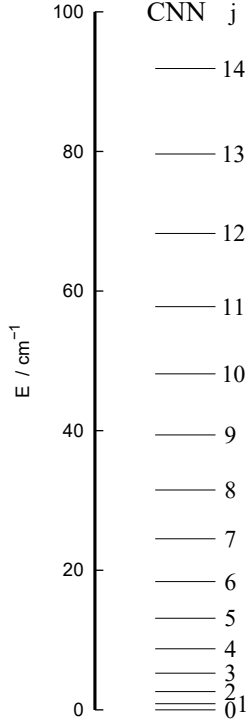

Supplement: d3cp03316c1.zip [file d3cp03316c1.zip]

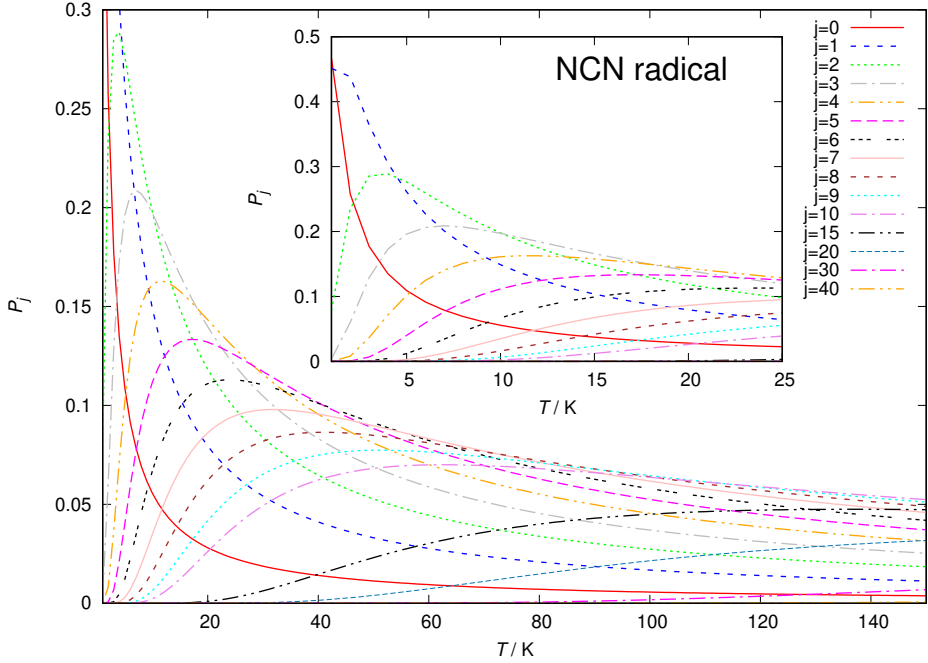

Supplement: d3cp03316c1.zip [file d3cp03316c1.zip]

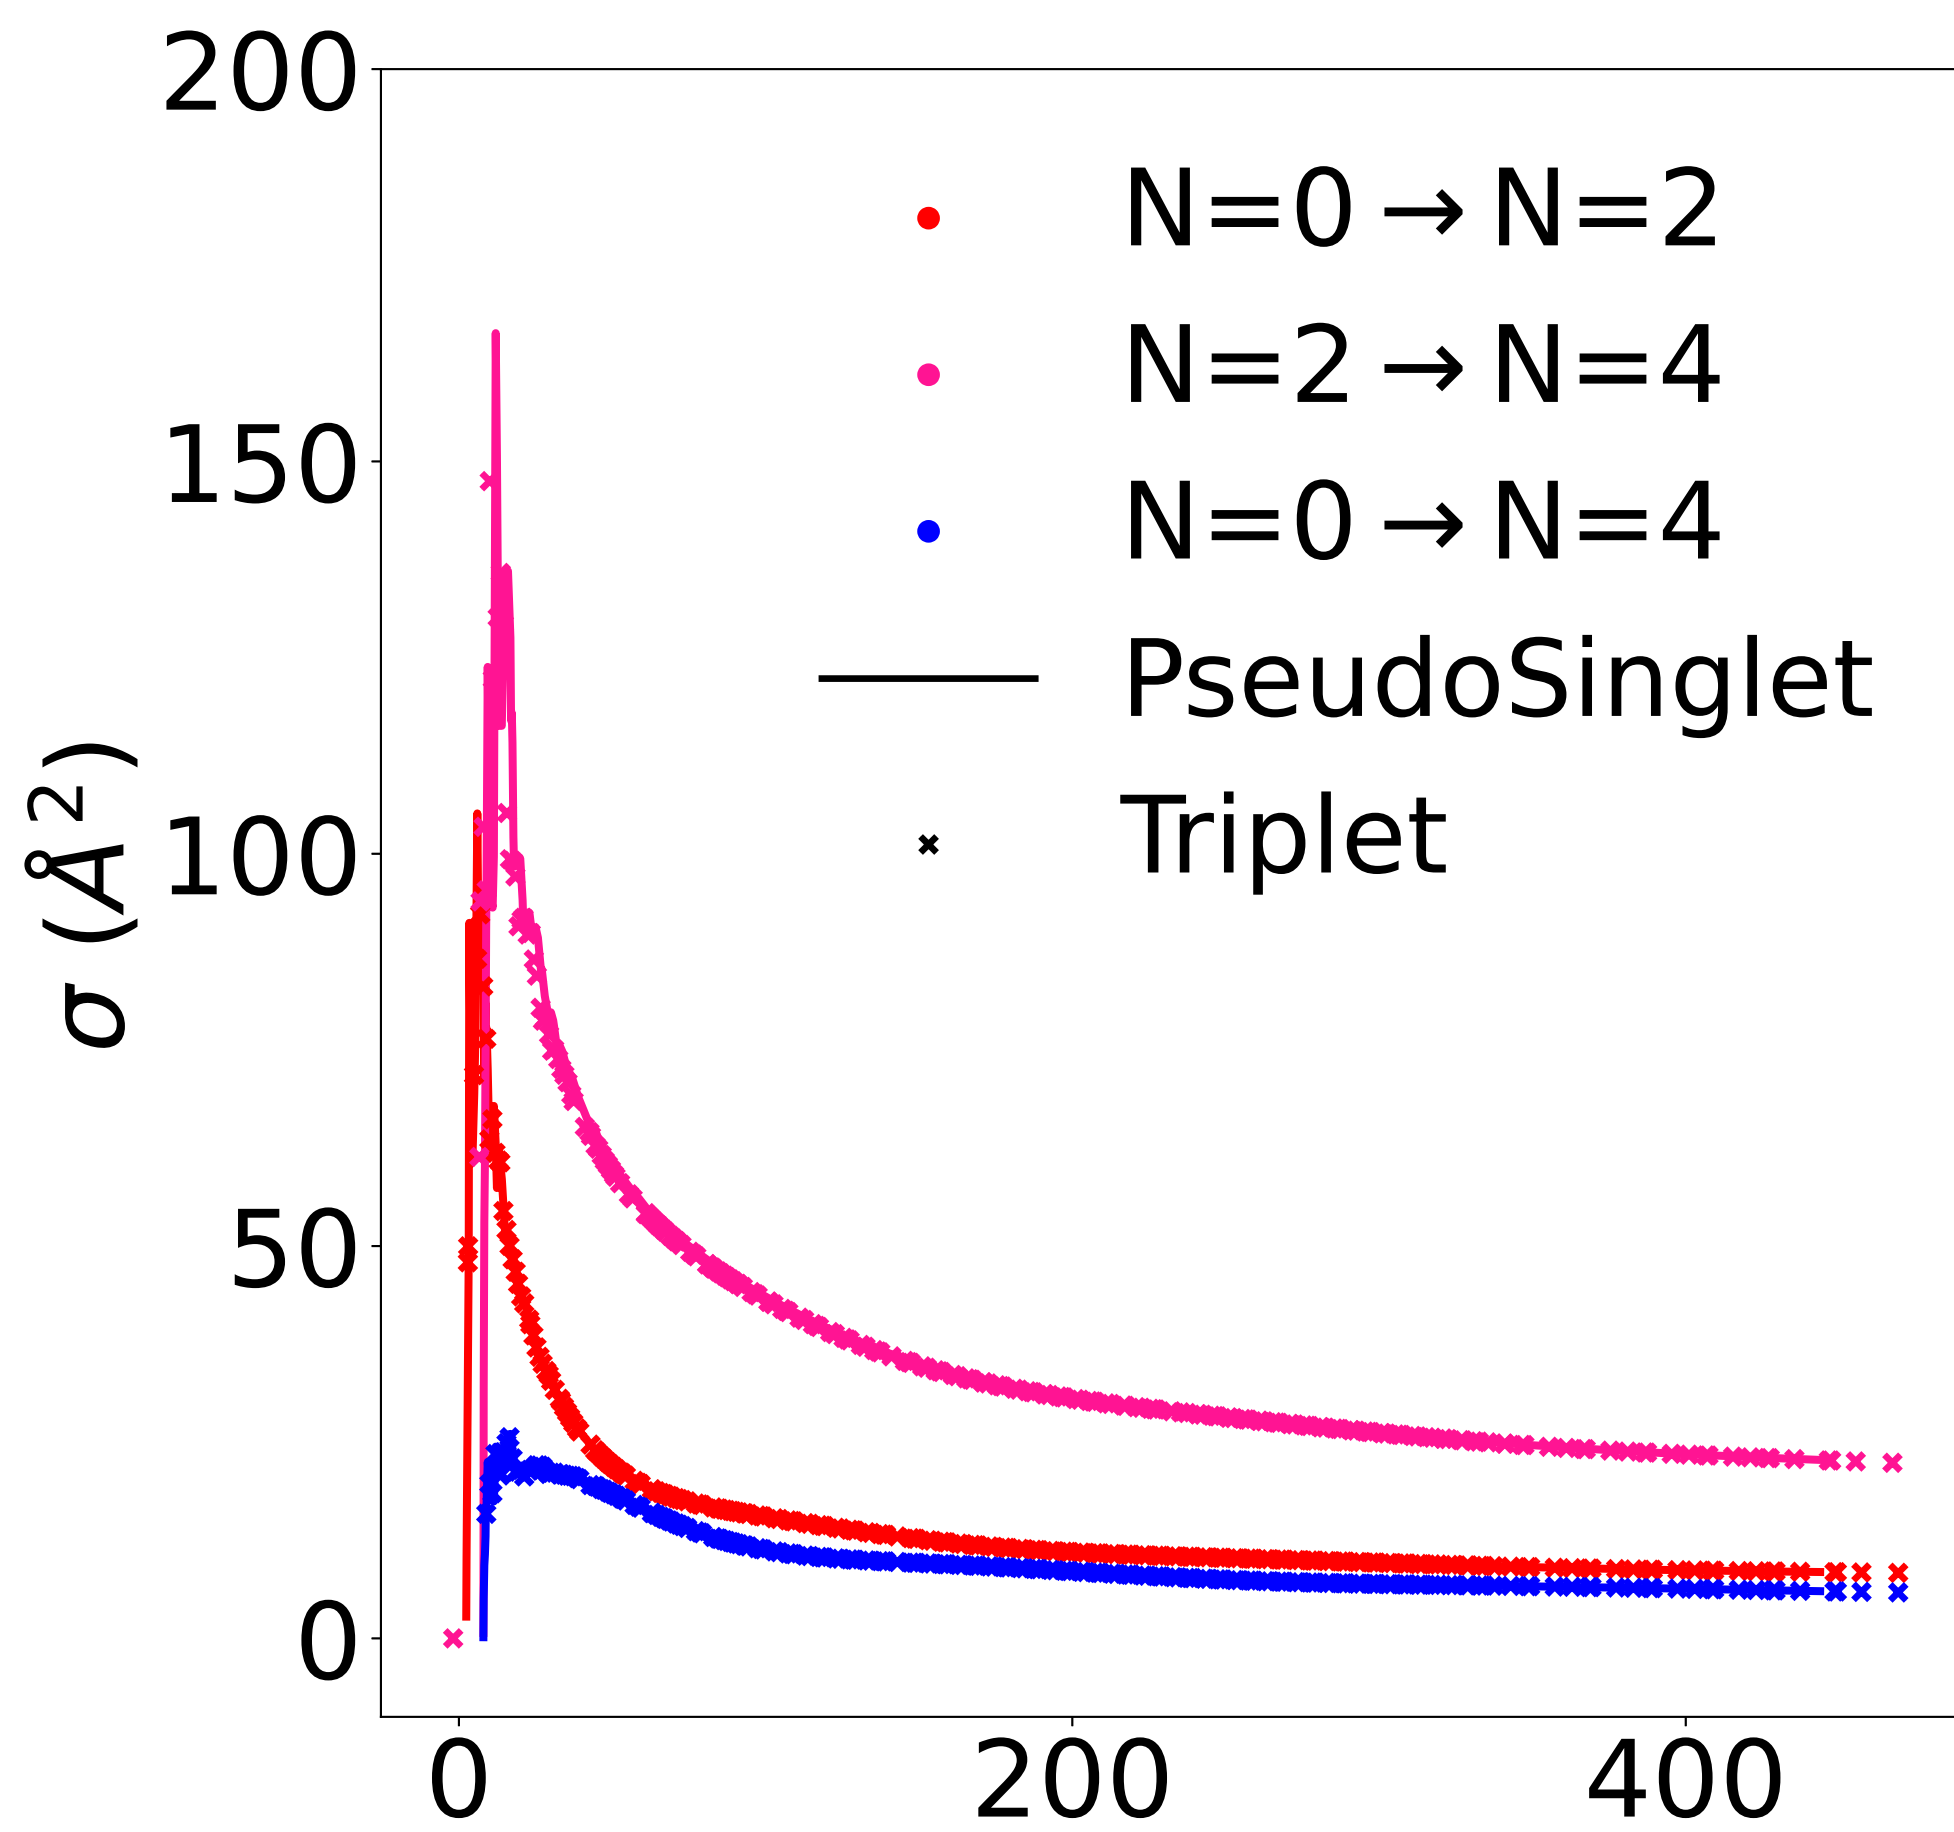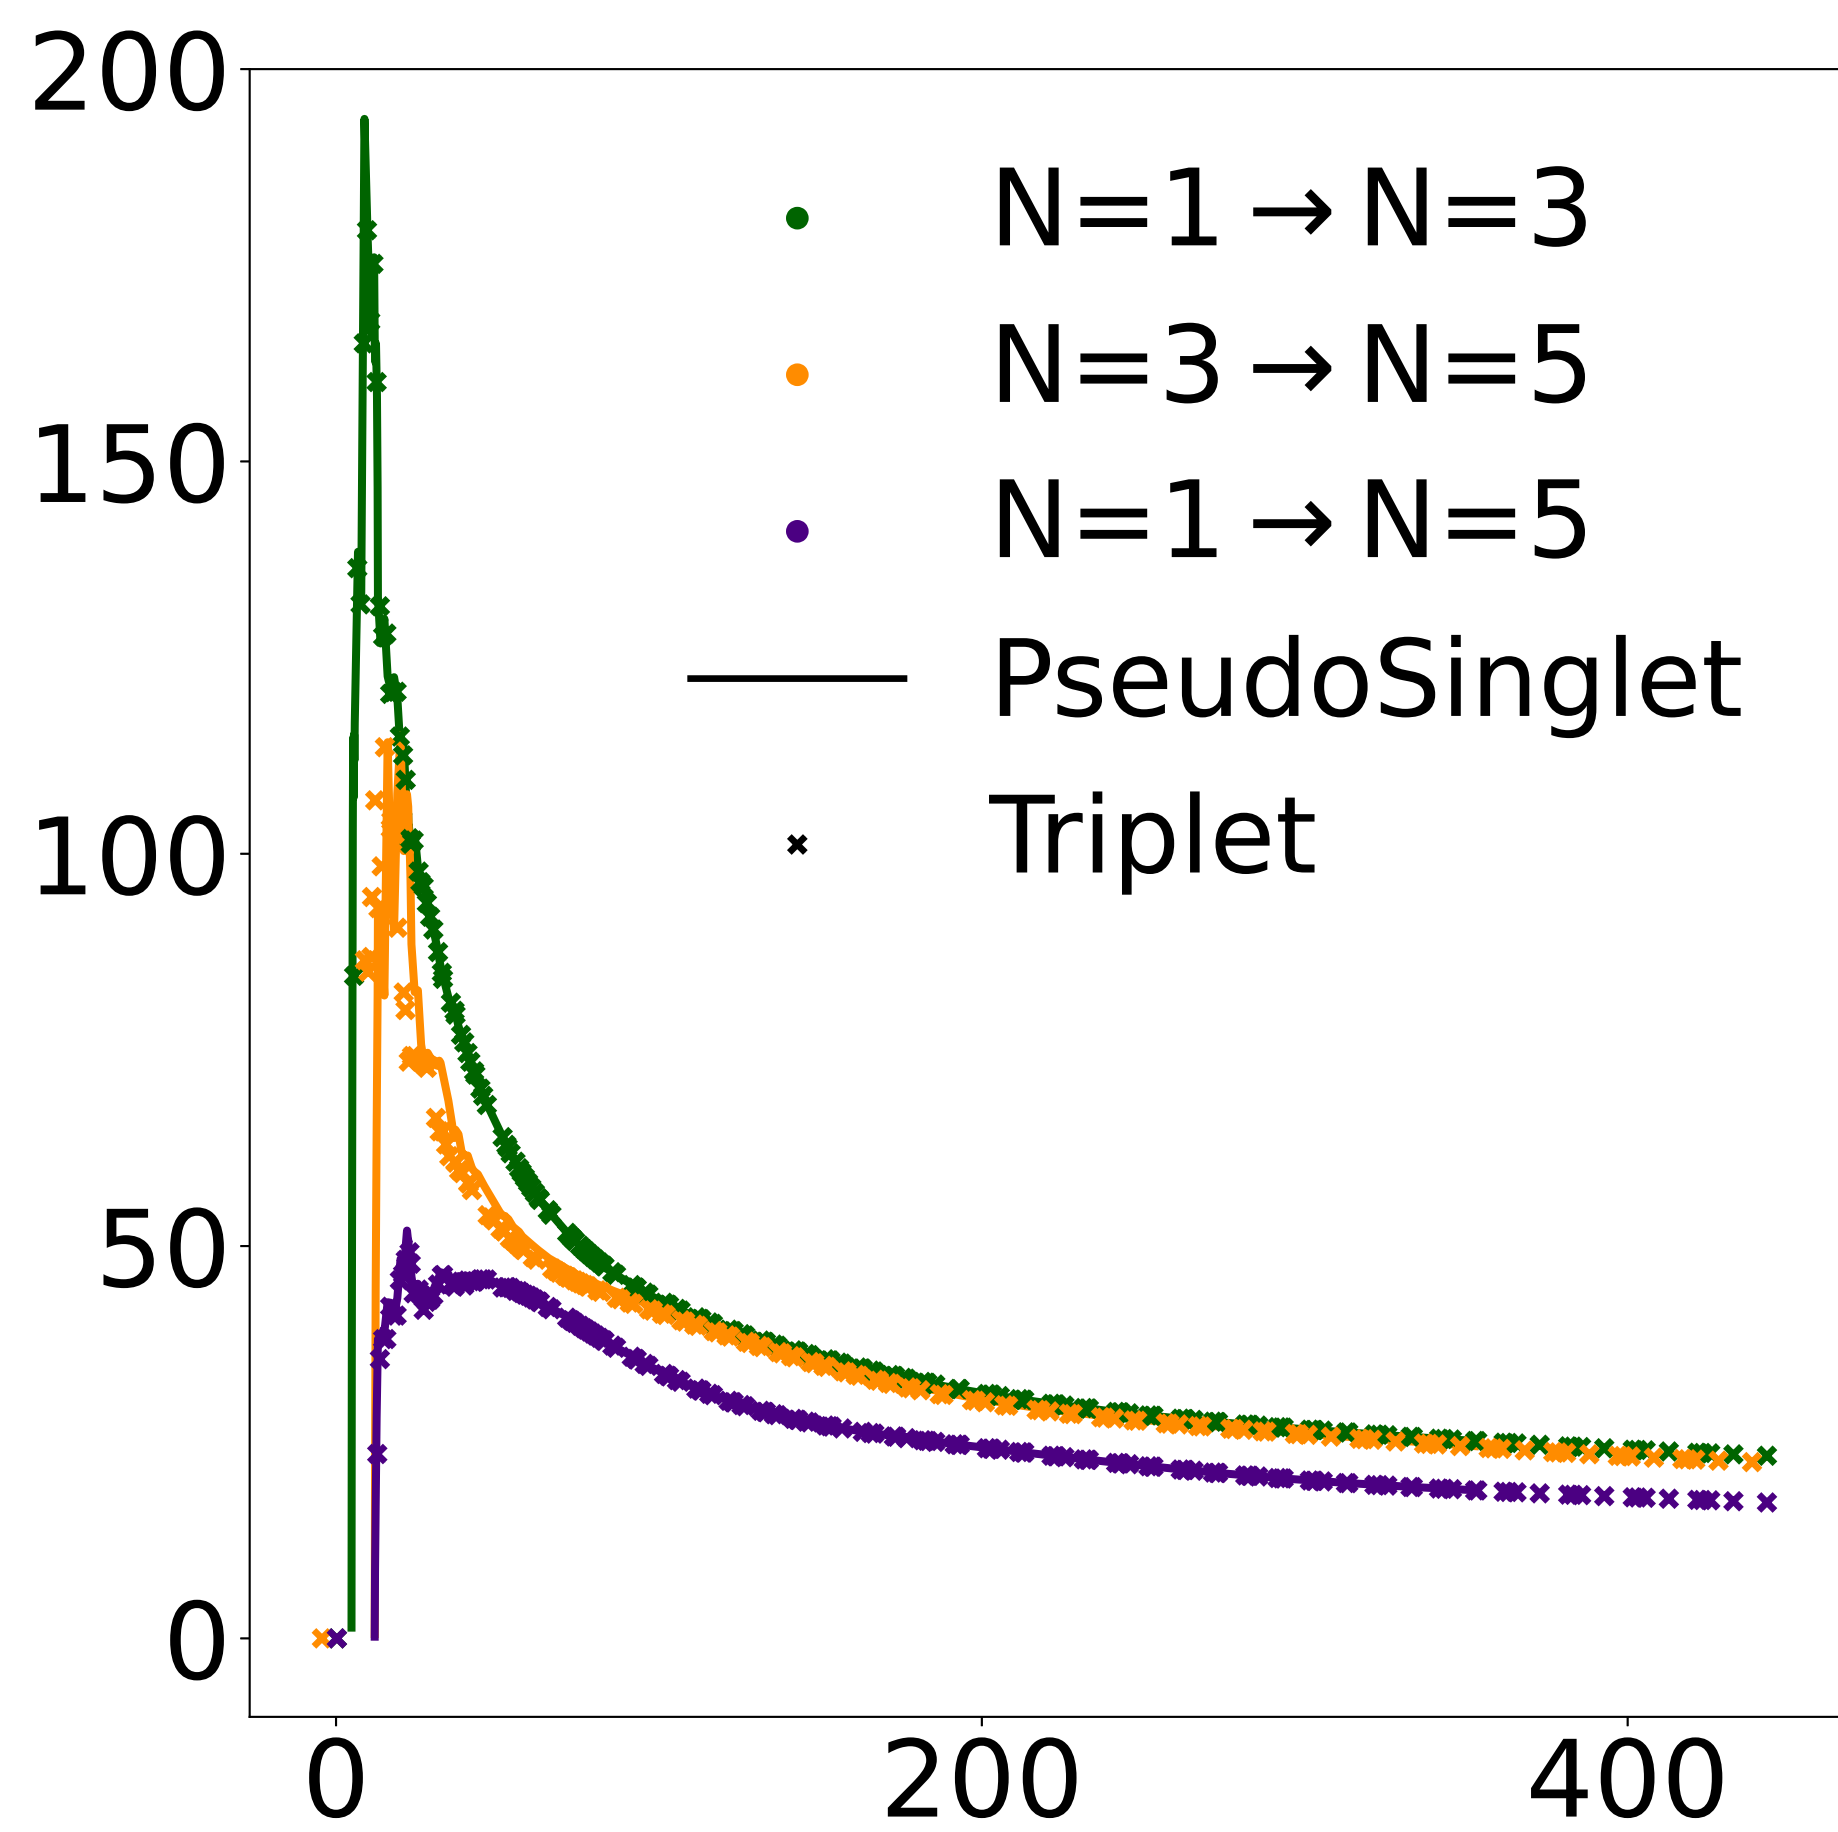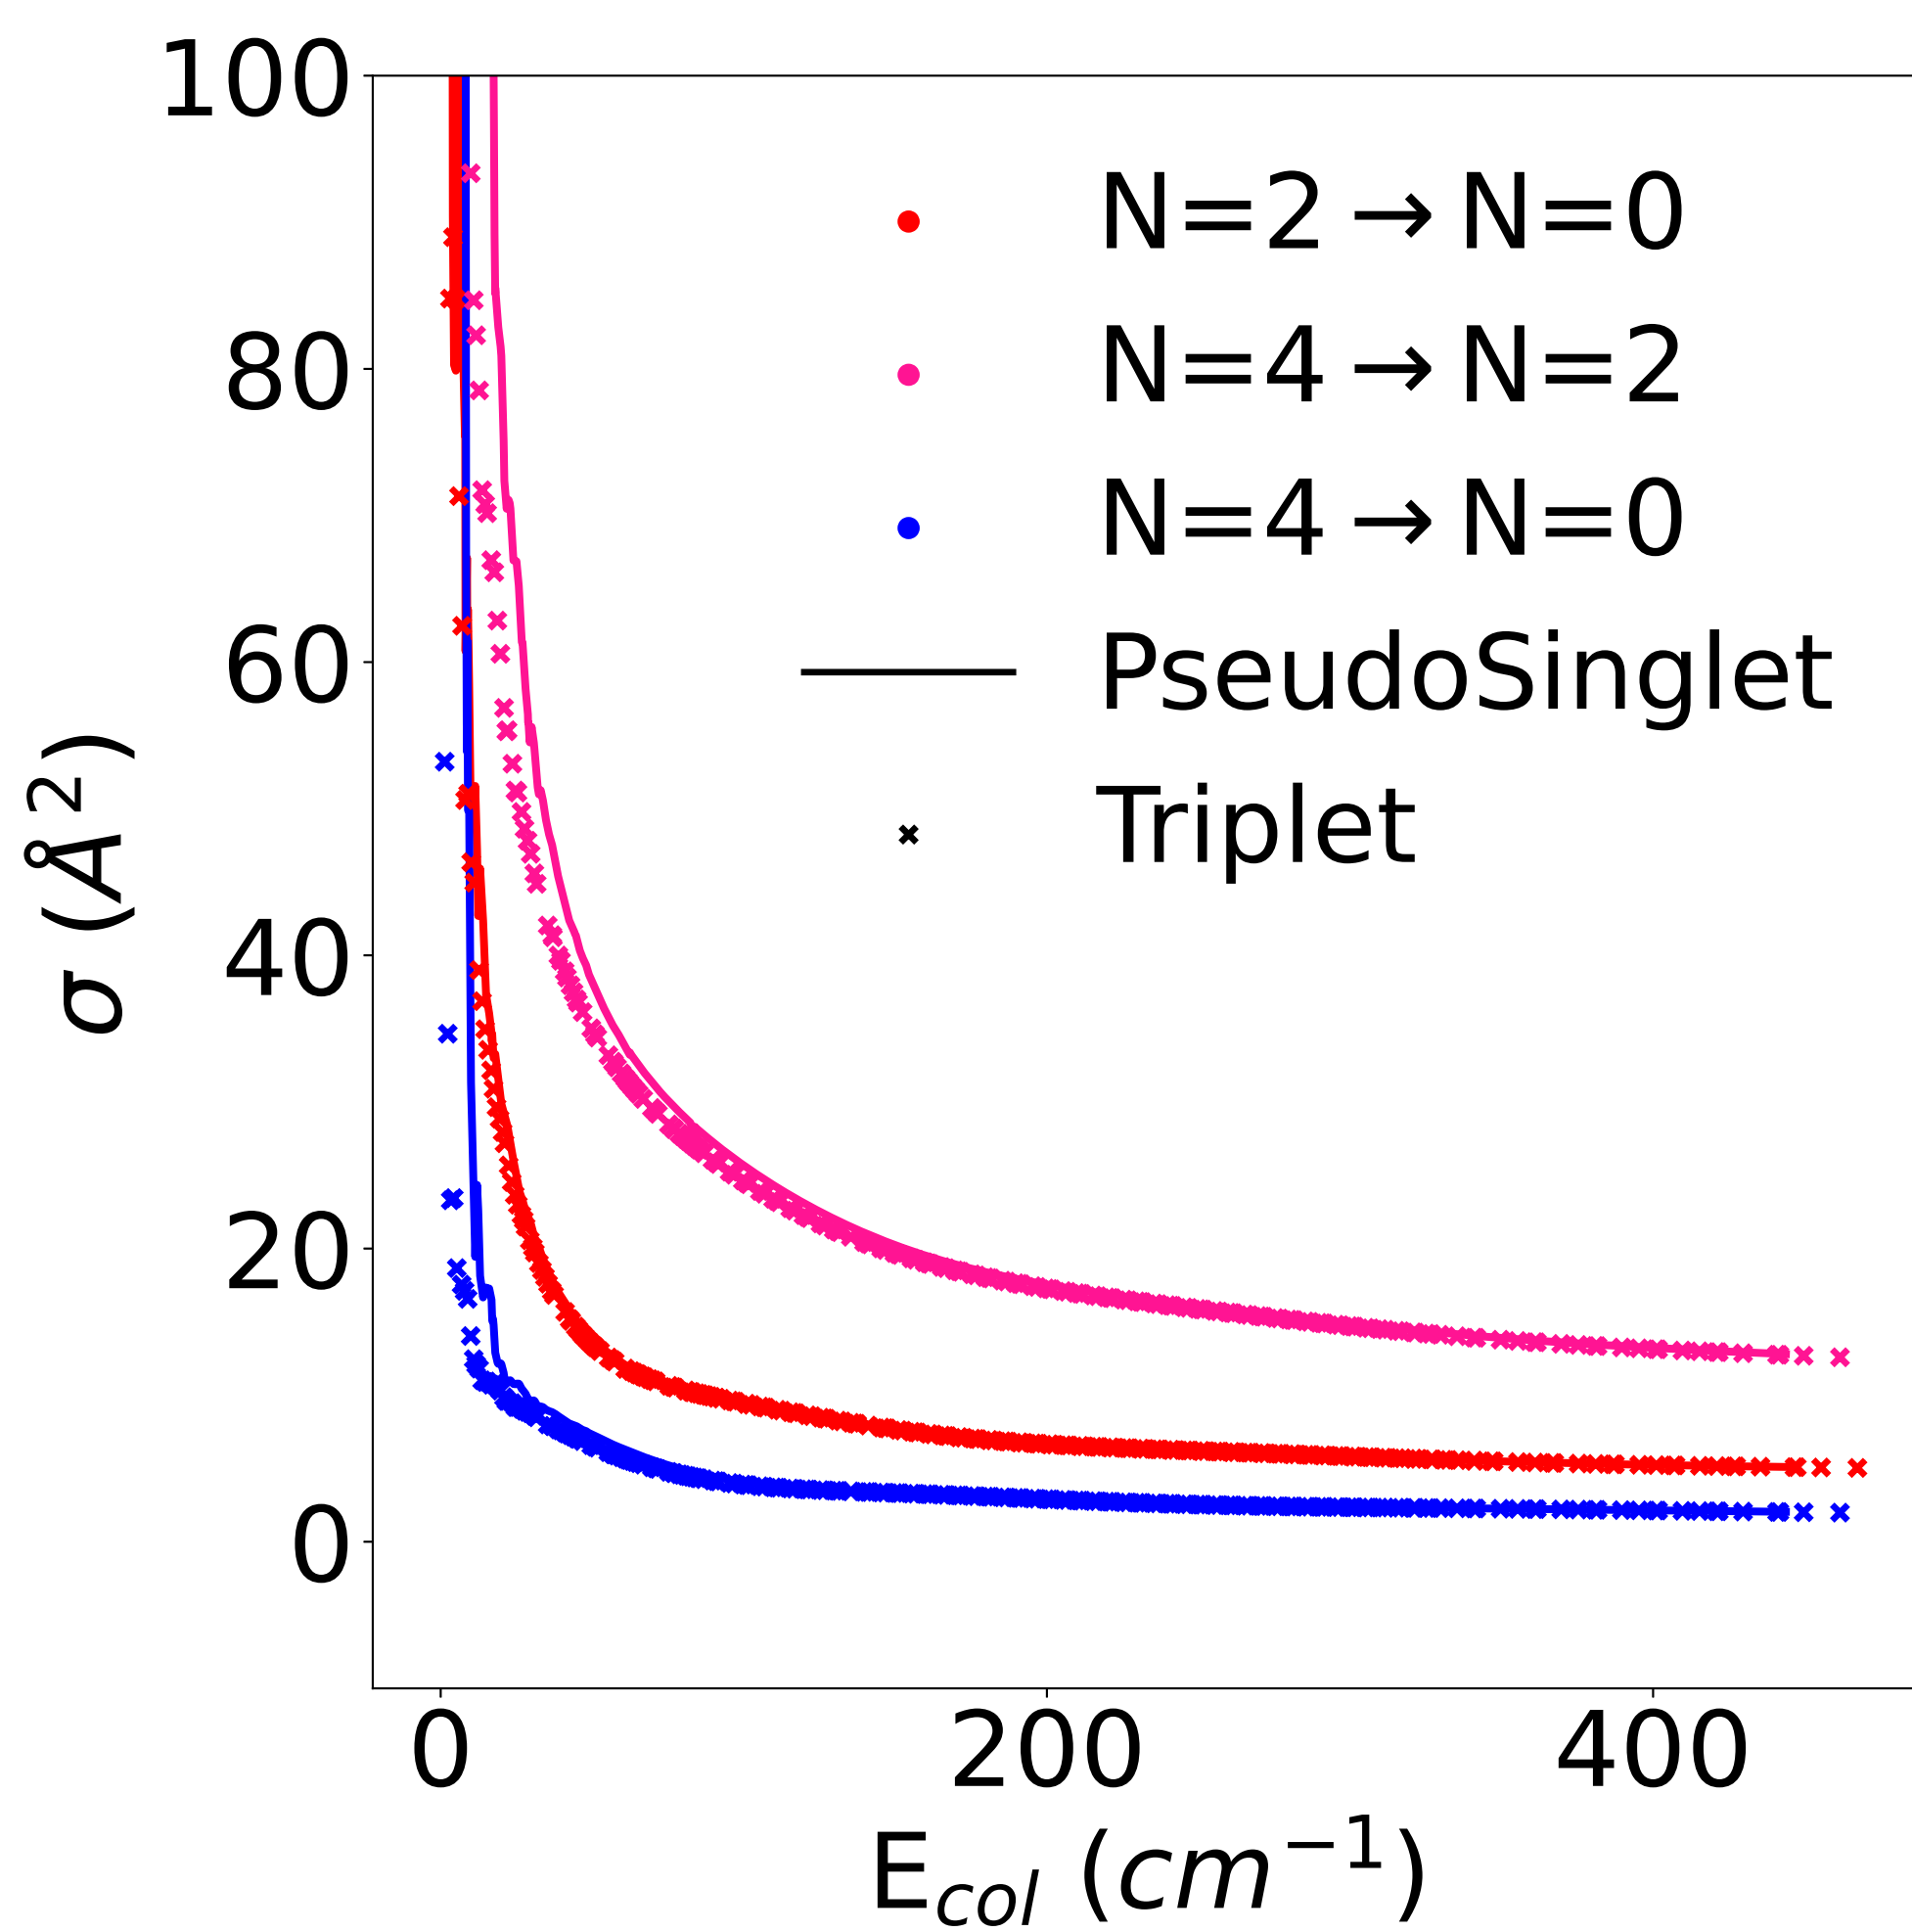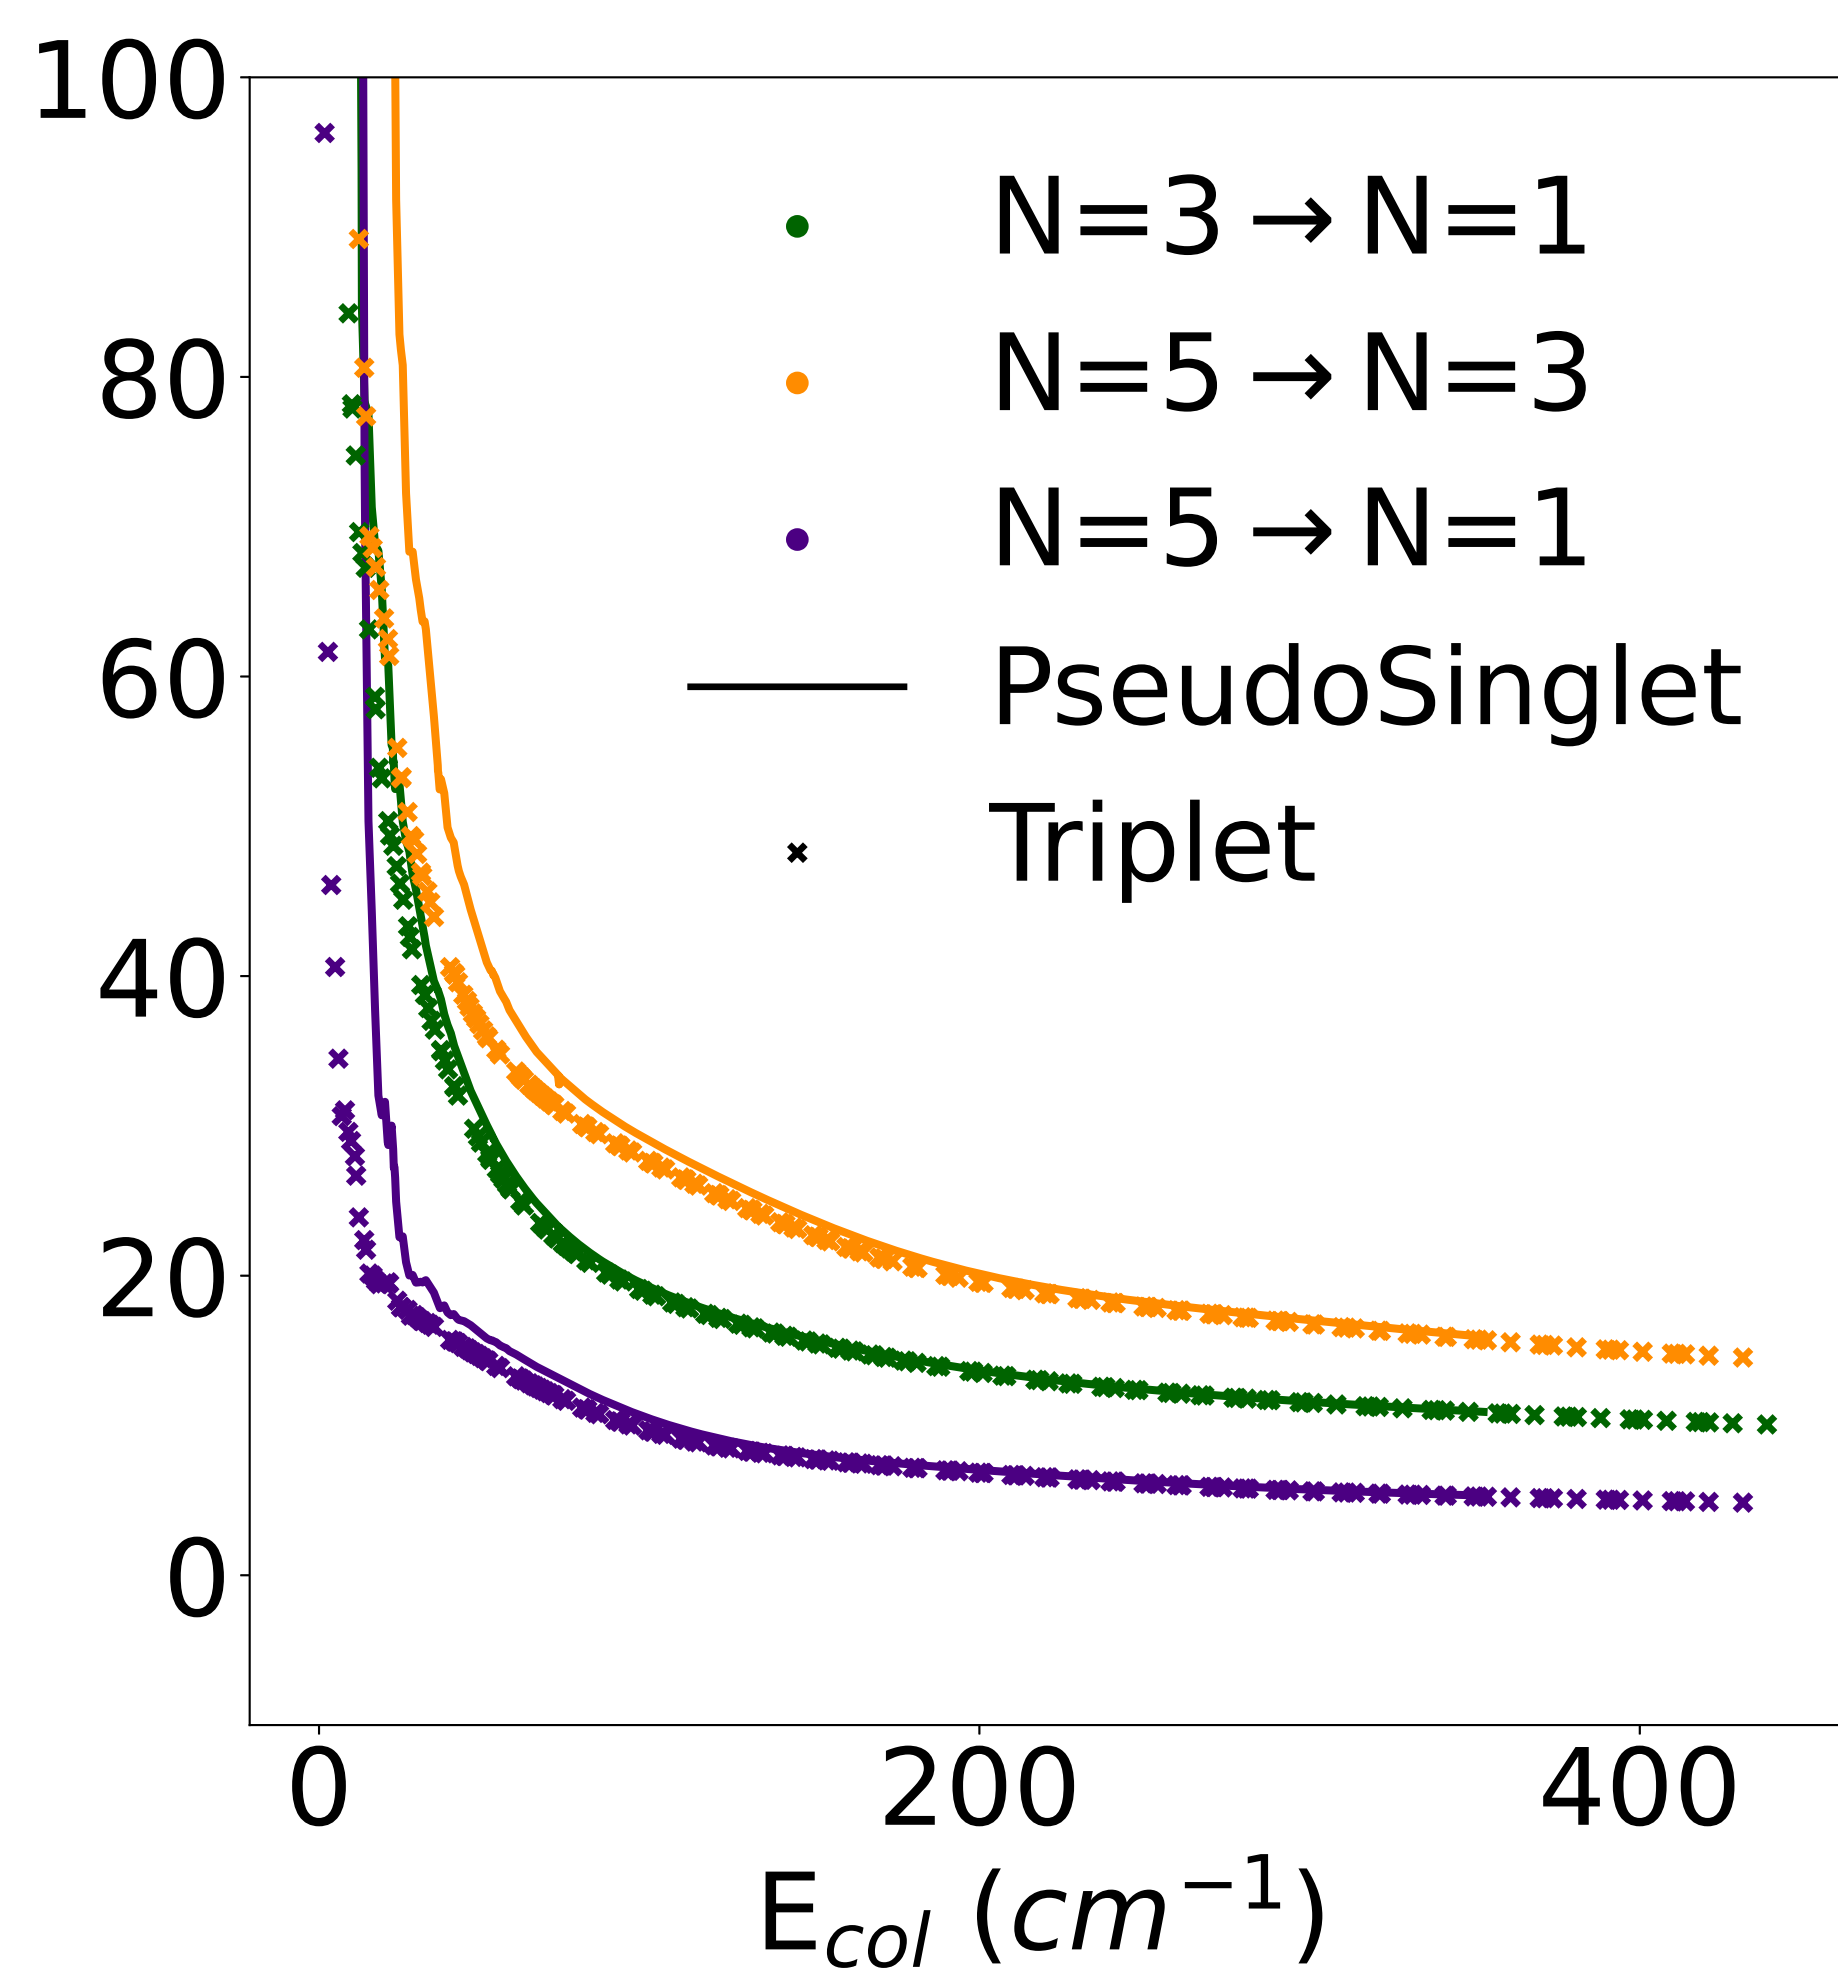

Supplement: d3cp03316c1.zip [file d3cp03316c1.zip]
